# Supplementary material for: TMEM59 potentiates Wnt signaling by promoting signalosome formation
Source: PubMed Central journal article supplement — Proc Natl Acad Sci U S A. 2018 Apr 9;115(17):E3996–4005. doi: 10.1073/pnas.1721321115 (PMC5924918; doi:10.1073/pnas.1721321115), 2018-04-09
Supplement: pnas.201721321SI.pdf [file pnas.201721321SI.pdf]

# Supporting Information

Gerlach et al. 10.1073/pnas.1721321115

## SI Materials and Methods

**Construct.** Murine V5–FZD4 was generated by replacing the earlier described V5–FZD5 by that of V5–FZD4 via standard PCR methods.

**Pulse-Chase.** Cells expressing the indicated constructs were grown in depletion medium (–Met/–Cys) for 30 min at 37 °C. Next, medium was exchanged with labeling medium (100  $\mu$ Ci  $^{35}$ S-Met/ $^{35}$ S-Cys per mL, Redivue; GE Healthcare) for 15 min at 37 °C. After the pulse, medium was replaced by chase medium (RPMI with 10% FCS and P/S) at 37 °C for the indicated times. After the chase, cells were washed with PBS containing 10 mM *N*-ethyl maleimide and lysed in lysis buffer (1% Triton X-100, 1 mM EDTA, 10  $\mu$ M leupeptin, 10  $\mu$ M aprotinin, and 1 mM PMSF in PBS). Immunoprecipitation was performed by incubation with mouse V5 antibodies (Life Technologies) for 1.5 h and 45 min with protein G beads (Millipore). Samples were washed three times with wash buffer (0.5% SDS, 0.66% Triton X-100, 0.25% deoxycholic acid, 0.5% BSA, and 0.66 mM EDTA, in PBS) and two times with PBS. Samples were resuspended in Laemmli sample buffer and loaded on SDS/PAGE gels. The gels were dried, and a phospho-imager screen (Molecular Dynamics) was used to measure radioactivity with a storm scanner (Amersham BioSciences).

**Reagents.** A concentration of 0.4  $\mu$ g/mL SWA (Sigma) and 2 mg/mL BADGP (Merck) was added to the cell culture medium before transfection, 24 h before experimental analysis. BFA (BD Biosciences) was added to the culture medium 4 h before experimental analysis at a concentration of 1  $\mu$ g/mL.

**Isolation of Wnt-Binding Complexes and Proteomics Analysis.** For each sample, HEK293T cells were seeded in 15,625-cm<sup>2</sup> tissue culture dishes and grown until confluency. Cells were stimulated with Wnt3a- or Wnt3a-iFlag-conditioned medium for 3 h and extensively washed with PBS, scraped, and pelleted at 500  $\times$  *g*. Cells were resuspended in 10 mL of lysis buffer and incubated for 1 h at 4 °C. Cell lysates were cleared by centrifugation at 20,000  $\times$  *g* for 30 min and incubated with 200  $\mu$ L of Flag-M2 beads (Sigma) overnight at 4 °C. Beads were washed three times with lysis buffer and three times with PBS. A total of 100  $\mu$ L of beads was collected for further analysis by mass spectrometry. Beads were resuspended in a spin filter column (Bio-Rad) and washed three additional times with 200  $\mu$ L of PBS. Bound proteins were eluted with 100  $\mu$ L of 0.5% RapiGest

(Waters) reagents in 50 mM ammonium bicarbonate, followed by 100  $\mu$ L of 8 M urea in 50 mM ammonium bicarbonate (pH 8.0). Eluted proteins were reduced with 1 mM DTT and alkylated with 5.5 mM iodoacetamide. For tryptic digestion, proteins were first digested with endoproteinase Lys-C (Wako Chemicals) at room temperature for 4 h, followed by sequencing-grade modified trypsin (Promega) overnight, after fourfold dilution with 50 mM ammonium bicarbonate. Protease digestion was stopped by addition of trifluoroacetic acid, and precipitates were removed after centrifugation. Peptides were desalted by using reversed-phase Sep-Pak C18 cartridges (Waters), then dried and stored at –20 °C. For mass spectrometric analysis, peptides were first separated with a C18 column (Zorbax) and introduced by nanoelectrospray into the LTQ Orbitrap Q Exactive (Thermo Fisher Scientific) and for MS acquisition followed by top 20 MS/MS in the form of collision-induced dissociation. MS raw files were analyzed by using Proteome Discoverer (Version 1.3). Tandem MS spectra, top 6 selected in 100-Da bin, were searched against the IPI Human database (Version 3.37, 69,186 entries). Trypsin/P was chosen as the protease, allowing two missed cleavages. Cysteine carbamidomethylation was set as fixed modification, and oxidation of methionine and acetylation of the N-terminal as variable modifications. Peptide tolerance was set to 15 ppm, while MS/MS tolerance was set to 0.5 Da.

**PNGase F and EndoH Treatment.** Immunoprecipitation of V5–FZD was performed as described above. Washed beads were treated with PNGase F (New England Biolabs) or EndoH (Roche) according to the manufacturer's instructions. Note that incubation steps were performed overnight at 37 °C. After enzyme incubation, the beads were taken up in SDS sample buffer.

**Sucrose Gradient Sedimentation.** Cells were grown to 80% confluency, stimulated for 4 h with Flag–Wnt3a-conditioned medium, washed with 25 mL of PBS, scraped in 6 mL of PBS per plate, and collected. Cell pellets were thoroughly resuspended and lysed for 1 h in cell lysis buffer containing 100 mM NaCl, 50 mM Tris (pH 7.5), 0.5% Triton X-100, 10% glycerol, 50 mM NaF, 10 mM Na<sub>3</sub>VO<sub>4</sub>, 10  $\mu$ M leupeptin, 10  $\mu$ M aprotinin, and 1 mM PMSF. Cell lysates were cleared by centrifugation for 20 min at 20,000  $\times$  *g* at 4 °C, and 450  $\mu$ L of lysate was layered onto a 10–40% sucrose gradient in 150 mM NaCl, 50 mM Tris (pH 7.5), 0.02% Triton X-100, 10% glycerol, and protease inhibitor mixture tablet (Roche). Ultracentrifugation was done in a Sorvall MLS50 rotor at 100,000  $\times$  *g* for 4 h at 4 °C.



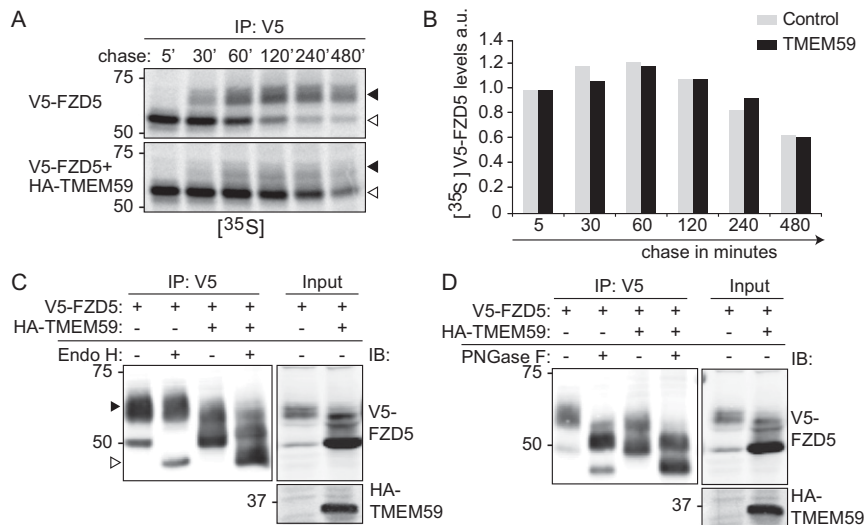

**Fig. S3.** Analysis of the effect of TMEM59 on FZD5 modifications. (A) Pulse-chase experiment of <sup>35</sup>S-Met/Cys-labeled V5-FZD5 in the presence or absence of HA-TMEM59. Cells were transfected with the indicated constructs and chased for the indicated times. Mature glycosylated V5-FZD5 (solid arrowhead) and immature V5-FZD5 (open arrowhead) are indicated. (B) Quantification of total V5-FZD5 levels of the pulse-chase experiment as shown in A. (C and D) Western blot analysis of Endo H (C) or PNGase F (D) treated V5-FZD immunoprecipitates.

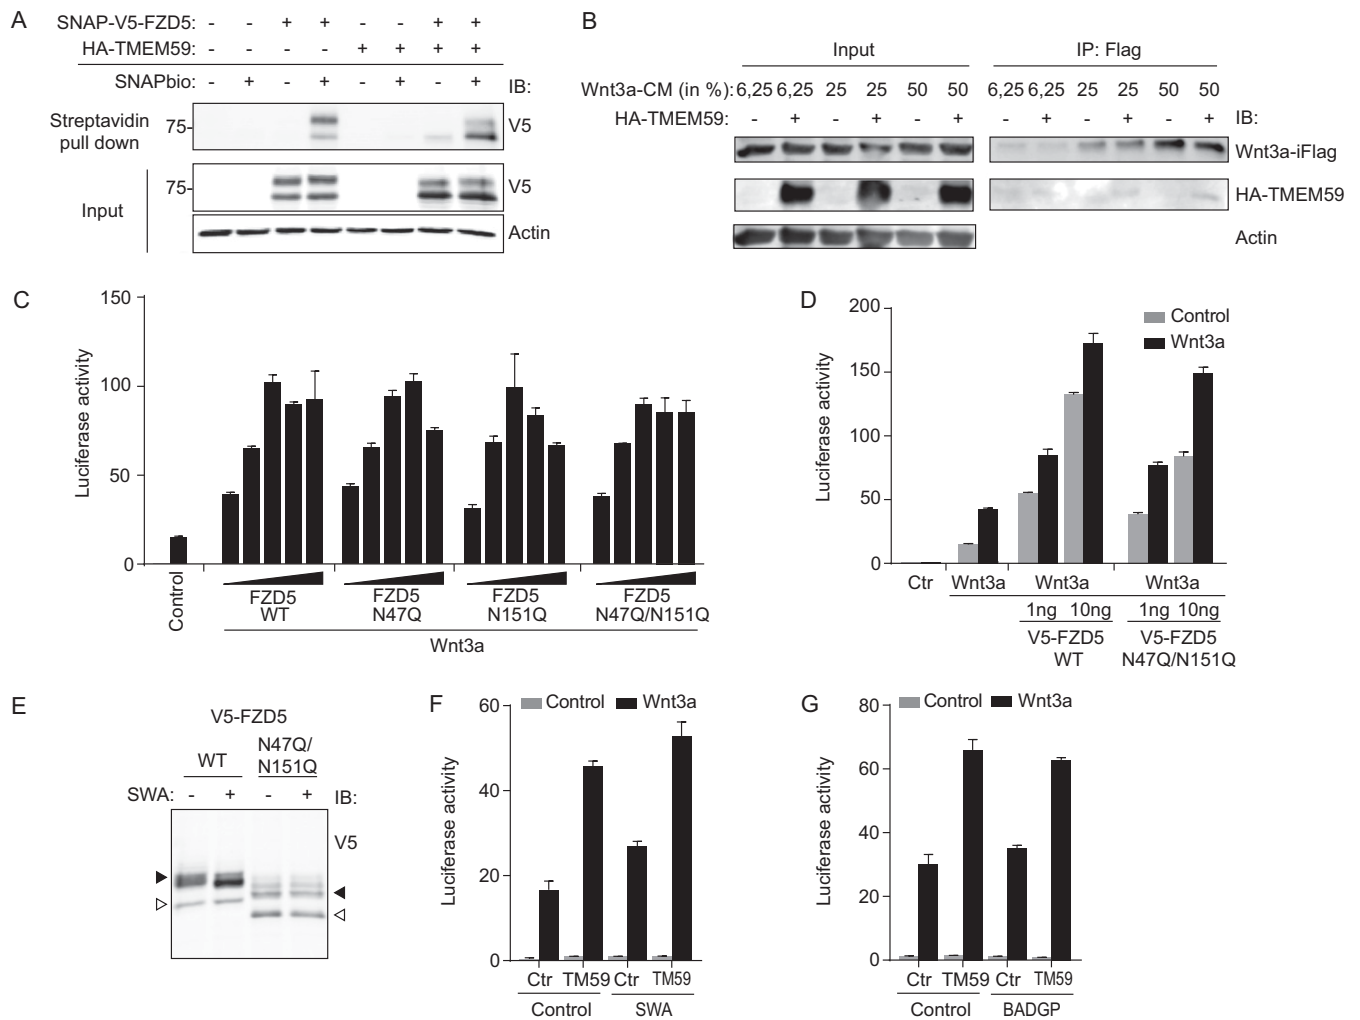

**Fig. S4.** Glycosylation status of FZD5 does not affect Wnt signaling. (A) SNAP-V5-FZD pull-down from HEK293T cells coexpressing HA-TMEM59 or mock plasmid. (B) Binding of Wnt3a-iFlag to control cells or cells expressing HA-TMEM59. Cells were transfected with mock plasmid or HA-TMEM59 and stimulated with Wnt3a-iFlag or Wnt3a medium for 3 h. Wnt3a-iFlag bound to cells was immunoprecipitated. (C) Wnt luciferase-reporter activity in HEK293T cells expressing increasing amounts of the indicated V5-FZD5 variants. Graph shows average luciferase reporter activities  $\pm$ SD. (D) Wnt luciferase-reporter activity in HEK293T cells coexpressing different amounts of the indicated V5-FZD5 constructs and HA-TMEM59. Graph shows average luciferase reporter activities  $\pm$ SD. (E) Western blot analysis of SWA-treated lysates of HEK293T cells expressing V5-FZD or V5-FZD5 N47Q/N151Q. Cells were treated o/n with 4  $\mu$ M SWA. Arrow heads indicate the immature (open) and complex glycosylated (solid) forms of each FZD variant. (F and G) Wnt luciferase-reporter activity in HEK293T cells expressing HA-TMEM59 and treated overnight with SWA (F) or BADGP (G). Graph shows average luciferase reporter activities  $\pm$ SD.

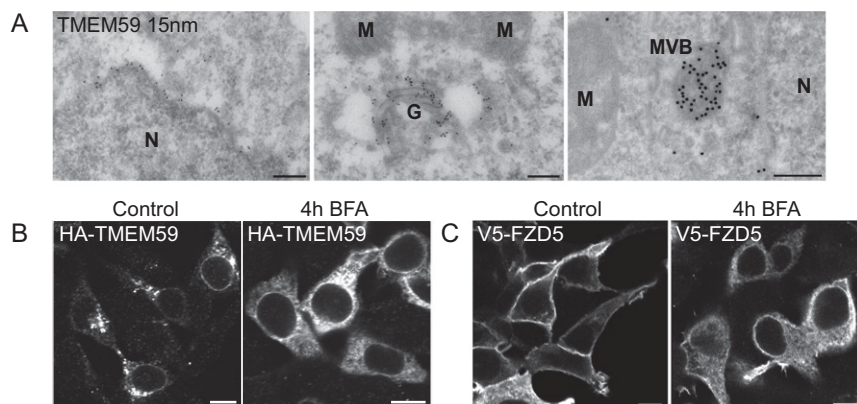

**Fig. S5.** Subcellular localization of TMEM59 and FZD5. (A) HA-TMEM59 localization by EM. Nucleus (N), Golgi (G), mitochondria (M) and multivesicular body (MVB) localization is indicated. (Scale bars, 200 nm.) (B and C) Confocal microscopy of HEK293T cells expressing HA-TMEM59 (B) or V5-FZD5 (C). Cells were treated with BFA for 4 h. (Scale bars, 10  $\mu$ m.)

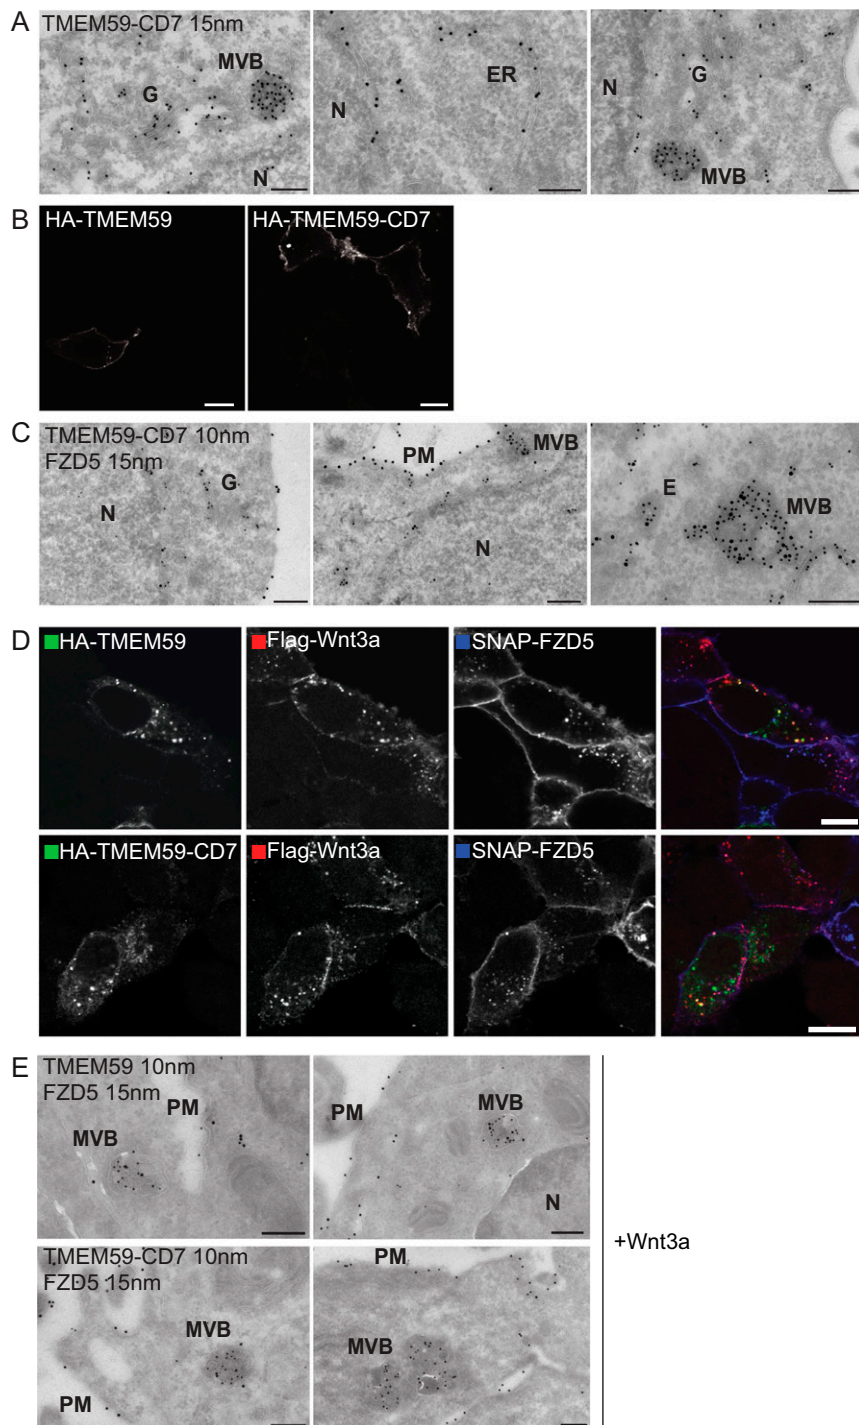

**Fig. S6.** Subcellular localization of TMEM59-CD7 and FZD5. (A) EM images of cells expressing HA-TMEM59-CD7 labeled with 10-nm gold particles. Endosomes (E), Golgi (G), mitochondria (M), and multivesicular bodies (MVB) are indicated. (Scale bars, 200 nm.) (B) Confocal microscopy of HEK293T cells expressing HA-TMEM59 or HA-TMEM59-CD7 in unpermeabilized cells. (Scale bars, 10  $\mu$ m.) (C) EM images of cells coexpressing HA-TMEM59-CD7 and V5-FZD5, labeled with 15- and 10-nm gold particles, respectively. Endosomes (E), nucleus (N), PM, mitochondria (M), and multivesicular bodies (MVB) are indicated. (Scale bars, 200 nm.) (D) Confocal microscopy of HEK293T cells expressing HA-TMEM59 (Upper) or HA-TMEM59-CD7 (Lower) and SNAP-FZD5. Cell surface SNAP-FZD5 was labeled with surface SNAP<sup>Alexa649</sup> and cells were chased for 3 h in the presence of Flag-Wnt3a. (Scale bars, 10  $\mu$ m.) (E) EM images of cells coexpressing HA-TMEM59 (Upper) or HA-TMEM59-CD7 (Lower) and V5-FZD5, labeled with 15- and 10-nm gold particles, respectively. Nucleus (N), PM, and multivesicular bodies (MVB) are indicated. (Scale bars, 200 nm.)





**Table S1. Results of the single siRNA screen to identify Wnt pathway regulators**

| Gene name                           | Average     | SD          |
|-------------------------------------|-------------|-------------|
| Smartpool siRNA screen              |             |             |
| RPN2                                | 2.337368488 | 1.468024889 |
| OPRS1                               | 2.17201201  | 0.364105405 |
| DAD1                                | 1.686740775 | 0.355373955 |
| SEC61A1                             | 1.635094858 | 0.178183293 |
| GPSN2                               | 1.542464246 | 0.275494309 |
| NUP210                              | 1.522693663 | 0.227732157 |
| ITM2B                               | 1.378823408 | 0.158407275 |
| CANX                                | 1.358721339 | 1.017811672 |
| LRP5                                | 0.614280514 | 0.069071578 |
| TMEM161A                            | 0.600062942 | 0.072301908 |
| SMBP                                | 0.560517047 | 0.063912758 |
| ATP2A2                              | 0.538866179 | 0.097269858 |
| TMEM33                              | 0.487169945 | 0.129598898 |
| TMEM59                              | 0.480706671 | 0.071317994 |
| HSPC163                             | 0.475629259 | 0.112644614 |
| FZD8                                | 0.404163829 | 0.094325995 |
| LRP6                                | 0.075969343 | 0.035404835 |
| Controls Smartpool siRNA screen     |             |             |
| APC_B1                              | 5.884755877 | 1.993384221 |
| APC_B2                              | 5.283998969 | 0.825753679 |
| APC_A2                              | 5.142846798 | 0.615530813 |
| APC_A1                              | 5.080122439 | 1.520597287 |
| b-catenin_A2                        | 0.041731469 | 0.026297221 |
| b-catenin_B2                        | 0.039031718 | 0.024078737 |
| b-catenin_B1                        | 0.032011218 | 0.012394444 |
| b-catenin_A1                        | 0.029486911 | 0.025564608 |
| Controls single siRNA deconvolution |             |             |
| APC_P1_A                            | 4.127224135 | 0.628925367 |
| APC_P1_B                            | 3.657764292 | 0.950024897 |
| APC_P2_A                            | 4.408365405 | 1.021531432 |
| APC_P2_B                            | 4.424452483 | 1.021383363 |
| APC_P3_A                            | 3.977787014 | 1.479400283 |
| APC_P3_B                            | 3.190871308 | 1.072152495 |
| b-catenin_P1_A                      | 0.005476981 | 0.001641369 |
| b-catenin_P1_B                      | 0.004349972 | 0.001608506 |
| b-catenin_P2_A                      | 0.006156614 | 0.003022435 |
| b-catenin_P2_B                      | 0.004026905 | 0.001353844 |
| b-catenin_P3_A                      | 0.016841367 | 0.020818128 |
| b-catenin_P3_B                      | 0.013128122 | 0.01250512  |

Wnt luciferase-reporter activity in HEK293T cells transfected with the indicated smartpool siRNAs. Shown are the averages and SD of triplicate measurements.

**Table S2. Results of the single siRNA screen to identify Wnt pathway regulators: Single siRNA deconvolution averages**

| Gene name | Average     |             |             |             |
|-----------|-------------|-------------|-------------|-------------|
|           | siRNA1      | siRNA2      | siRNA3      | siRNA4      |
| RPN2      | 0.53768086  | 0.722143016 | 0.540919762 | 0.509147687 |
| OPRS1     | 0.579841388 | 0.410538947 | 3.151137392 | 0.477744114 |
| DAD1      | 0.489641863 | 0.738383156 | 0.454801603 | 0.987589107 |
| SEC61A1   | 0.777156254 | 0.931509404 | 0.52465231  | 0.615411411 |
| GPSN2     | 0.738713133 | 0.665824231 | 0.716662805 | 2.144469475 |
| NUP210    | 0.495901934 | 0.746921914 | 0.615606664 | 0.72450877  |
| ITM2B     | 0.542281685 | 0.889657383 | 0.554717814 | 0.645009742 |
| CANX      | 0.468228225 | 0.330478821 | 0.596462912 | 0.680635692 |
| LRP5      | 0.407572092 | 0.473788214 | 0.468645528 | 0.354653745 |
| TMEM161A  | 0.503896974 | 0.768030811 | 0.975494396 | 0.736876158 |
| SMBP      | 0.561523456 | 0.609488204 | 0.456636878 | 0.447900937 |
| ATP2A2    | 0.359323076 | 0.341938438 | 0.456757905 | 0.287571139 |
| TMEM33    | 0.48353857  | 0.444220692 | 0.522213369 | 0.549919411 |
| TMEM59    | 0.490585822 | 0.541617722 | 0.373386992 | 0.507998236 |
| HSPC163   | 0.509551912 | 0.286362034 | 0.514512346 | 0.456286189 |
| FZD8      | 0.448673228 | 0.362249307 | 0.318612615 | 0.268006144 |
| LRP6      | 0.754807354 | 0.019111884 | 0.224635784 | 0.136610841 |

Wnt luciferase-reporter activity in HEK293T cells transfected with the indicated single siRNAs. Shown are the averages of triplicate measurements.

**Table S3. Results of the single siRNA screen to identify Wnt pathway regulators: Single siRNA deconvolution SDs**

| Gene name | SD          |             |             |             |
|-----------|-------------|-------------|-------------|-------------|
|           | siRNA1      | siRNA2      | siRNA3      | siRNA4      |
| RPN2      | 0.113641971 | 0.173813823 | 0.142633139 | 0.080528103 |
| OPRS1     | 0.07198508  | 0.080926042 | 0.915615073 | 0.099487587 |
| DAD1      | 0.2065013   | 0.250619281 | 0.109561432 | 0.316139249 |
| SEC61A1   | 0.143496822 | 0.328852549 | 0.137715248 | 0.156031267 |
| GPSN2     | 0.188090963 | 0.120847469 | 0.301111635 | 1.029098147 |
| NUP210    | 0.101900513 | 0.145914941 | 0.319718416 | 0.161759611 |
| ITM2B     | 0.142793587 | 0.469847738 | 0.12195158  | 0.215630929 |
| CANX      | 0.126640609 | 0.185473297 | 0.441284667 | 0.220430964 |
| LRP5      | 0.082026712 | 0.290943731 | 0.281479277 | 0.084367588 |
| TMEM161A  | 0.354960183 | 0.237635873 | 0.531890901 | 0.332486348 |
| SMBP      | 0.101441723 | 0.11991236  | 0.240431747 | 0.099236492 |
| ATP2A2    | 0.089148224 | 0.08371503  | 0.09699205  | 0.035885502 |
| TMEM33    | 0.086583311 | 0.108142407 | 0.088530629 | 0.080002345 |
| TMEM59    | 0.091125619 | 0.095513677 | 0.121233869 | 0.079522411 |
| HSPC163   | 0.142527374 | 0.098677408 | 0.149184834 | 0.079436145 |
| FZD8      | 0.095557842 | 0.049966163 | 0.100712564 | 0.057974104 |
| LRP6      | 0.220547864 | 0.003211963 | 0.057344214 | 0.040428241 |

Wnt luciferase-reporter activity in HEK293T cells transfected with the indicated single siRNAs. Shown are the SDs of triplicate measurements.

**Dataset S1. List of Wnt receptor complex-associated proteins identified by mass spectrometry-based proteomics analysis, leading to the identification of TMEM59 as a member of the Wnt receptor complex**

[Dataset S1](#)

Cells were either left untreated or transfected with V5-FZD5, myc-LRP6, and MESD, as indicated. Cells were stimulated with Wnt3a or Wnt3a-iFlag for 3 h before lysis and subsequently subjected to Flag-immunoprecipitations. Isolated complexes were analyzed with liquid chromatography-tandem mass spectrometry. The number of identified unique peptides for each protein hit is indicated. Known Wnt pathway modifiers are highlighted in green; TMEM59 is highlighted in orange.
